# Supplementary material
Source: PubMed Central journal article supplement (PMC3222859)
Supplement: NIHMS320704-supplement-01.pdf [file NIHMS320704-supplement-01.pdf]

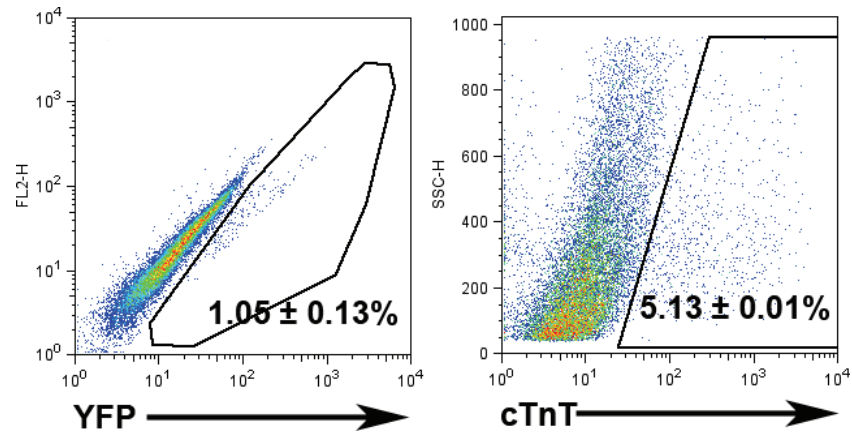

**Supplementary figure 1.** Flow cytometry profile of EB day 10 *Mlc2v-Cre;Rosa26-Yfp* mESCs. Day 10 EBs were dissociated into single cells and analyzed with flow cytometry for YFP fluorescence. Dissociated cells were fixed, immunostained with cardiac troponin T and quantified by flowcytometry. The values are reported as the mean  $\pm$  S.E.M.
